# Supplementary material for: ERBB2 mRNA Expression and Response to Ado-Trastuzumab Emtansine (T-DM1) in HER2-Positive Breast Cancer
Source: MDPI journal article supplement (doi:10.3390/cancers12071902), 2020-07-14
Supplement: s1 [file s1]

# **ERBB2 mRNA Expression and Response to Ado-Trastuzumab Emtansine (T-DM1) in HER2-Positive Breast Cancer**

**Table S1.** Proportions of *ERBB2*-high tumors across cancer types. *ERBB2* mRNA was evaluated in 10,071 cancers. *ERBB2*-high tumors were identified in 15 cancer-types as shown below, while no *ERBB2*-high tumors were identified in 18 cancer-types, including acute myeloid leukemia ( $n = 173$ ), adrenocortical carcinoma ( $n = 78$ ), brain lower grade glioma ( $n = 514$ ), cholangiocarcinoma ( $n = 36$ ), diffuse large B-cell lymphoma ( $n = 48$ ), glioblastoma multiform ( $n = 160$ ), kidney chromophobe ( $n = 65$ ), kidney renal clear cell carcinoma ( $n = 510$ ), kidney renal papillary cell carcinoma ( $n = 283$ ), liver hepatocellular carcinoma ( $n = 366$ ), mesothelioma ( $n = 87$ ), pheochromocytoma and paraganglioma ( $n = 178$ ), sarcoma ( $n = 253$ ), skin cutaneous melanoma ( $n = 443$ ), testicular germ cell tumors ( $n = 149$ ), thymoma ( $n = 119$ ), thyroid carcinoma ( $n = 498$ ), uveal melanoma ( $n = 80$ ).

| Cancer Type                             | Total ( <i>n</i> ) | ERBB2-low ( <i>n</i> ) | ERBB2-High ( <i>n</i> ) | % ERBB2-High |
|-----------------------------------------|--------------------|------------------------|-------------------------|--------------|
| Breast Invasive Carcinoma HER2 Positive | 112                | 46                     | 66                      | 58.93        |
| Breast Invasive Carcinoma               | 1082               | 991                    | 91                      | 8.41         |
| Stomach Adenocarcinoma                  | 412                | 386                    | 26                      | 6.31         |
| Esophageal Adenocarcinoma               | 181                | 170                    | 11                      | 6.08         |
| Cervical Squamous Cell Carcinoma        | 294                | 282                    | 12                      | 4.08         |
| Bladder Urothelial Carcinoma            | 407                | 391                    | 16                      | 3.93         |
| Rectum Adenocarcinoma                   | 154                | 148                    | 6                       | 3.90         |
| Pancreatic Adenocarcinoma               | 177                | 171                    | 6                       | 3.39         |
| Uterine Corpus Endometrial Carcinoma    | 527                | 516                    | 11                      | 2.09         |
| Uterine Carcinosarcoma                  | 57                 | 56                     | 1                       | 1.75         |
| Colon Adenocarcinoma                    | 438                | 433                    | 5                       | 1.14         |
| Ovarian Serous Cystadenocarcinoma       | 300                | 297                    | 3                       | 1.00         |
| Head and Neck Squamous Cell Carcinoma   | 515                | 510                    | 5                       | 0.97         |
| Lung Squamous Cell Carcinoma            | 484                | 480                    | 4                       | 0.83         |
| Lung Adenocarcinoma                     | 510                | 507                    | 3                       | 0.59         |
| Breast Invasive Carcinoma HER2 Negative | 645                | 643                    | 2                       | 0.31         |
| Prostate Adenocarcinoma                 | 493                | 492                    | 1                       | 0.20         |
| ALL                                     | 6788               | 6519                   | 269                     | 3.96         |

**Table S2.** Table of abbreviations.

| <b>Cancer Type</b>                      | <b>Abbreviation</b> |
|-----------------------------------------|---------------------|
| Acute Myeloid Leukemia                  | AML                 |
| Adrenocortical Carcinoma                | ACC                 |
| Bladder Urothelial Carcinoma            | BLCA                |
| Brain Lower Grade Glioma                | BLGG                |
| Breast Invasive Carcinoma               | BRCA                |
| Breast Invasive Carcinoma HER2 Negative | BRCA.HER2-          |
| Breast Invasive Carcinoma HER2 Positive | BRCA.HER2+          |
| Cervical Squamous Cell Carcinoma        | CESC                |
| Cholangiocarcinoma                      | CHOL                |
| Colon Adenocarcinoma                    | COAD                |
| Diffuse Large B-Cell Lymphoma           | DLBCL               |
| Esophageal Adenocarcinoma               | EAC                 |
| Glioblastoma Multiforme                 | GBM                 |
| Head and Neck Squamous Cell Carcinoma   | HNSC                |
| Kidney Chromophobe                      | KICG                |
| Kidney Renal Clear Cell Carcinoma       | KIRC                |
| Kidney Renal Papillary Cell Carcinoma   | KIRP                |
| Liver Hepatocellular Carcinoma          | LIHC                |
| Lung Adenocarcinoma                     | LUAD                |
| Lung Squamous Cell Carcinoma            | LSCC                |
| Mesothelioma                            | MESO                |
| Ovarian Serous Cystadenocarcinoma       | OVSC                |
| Pancreatic Adenocarcinoma               | PAAD                |
| Pheochromocytoma and Paraganglioma      | PCPG                |
| Prostate Adenocarcinoma                 | PRAD                |
| Rectum Adenocarcinoma                   | REAC                |
| Sarcoma                                 | SARC                |
| Skin Cutaneous Melanoma                 | SKCM                |
| Stomach Adenocarcinoma                  | STAD                |
| Testicular Germ Cell Tumors             | TGCT                |
| Thymoma                                 | THYM                |
| Thyroid Carcinoma                       | THCA                |
| Uterine Carcinosarcoma                  | UCS                 |
| Uterine Corpus Endometrial Carcinoma    | UCEC                |
| Uveal Melanoma                          | UVM                 |

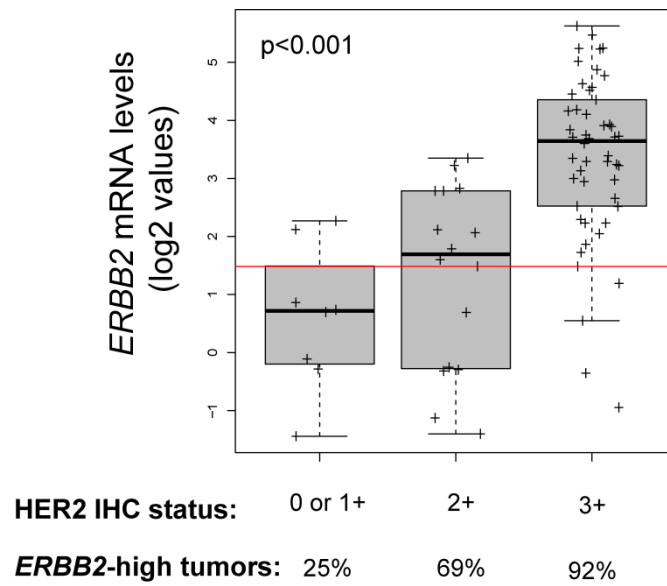

**Figure S1.** Distribution of *ERBB2* mRNA levels across HER2 IHC subgroups of tumors of the T-DM1 cohort. The proportion of *ERBB2*-high tumors is indicated as defined by the *ERBB2* mRNA cutoff (shown as a red line).

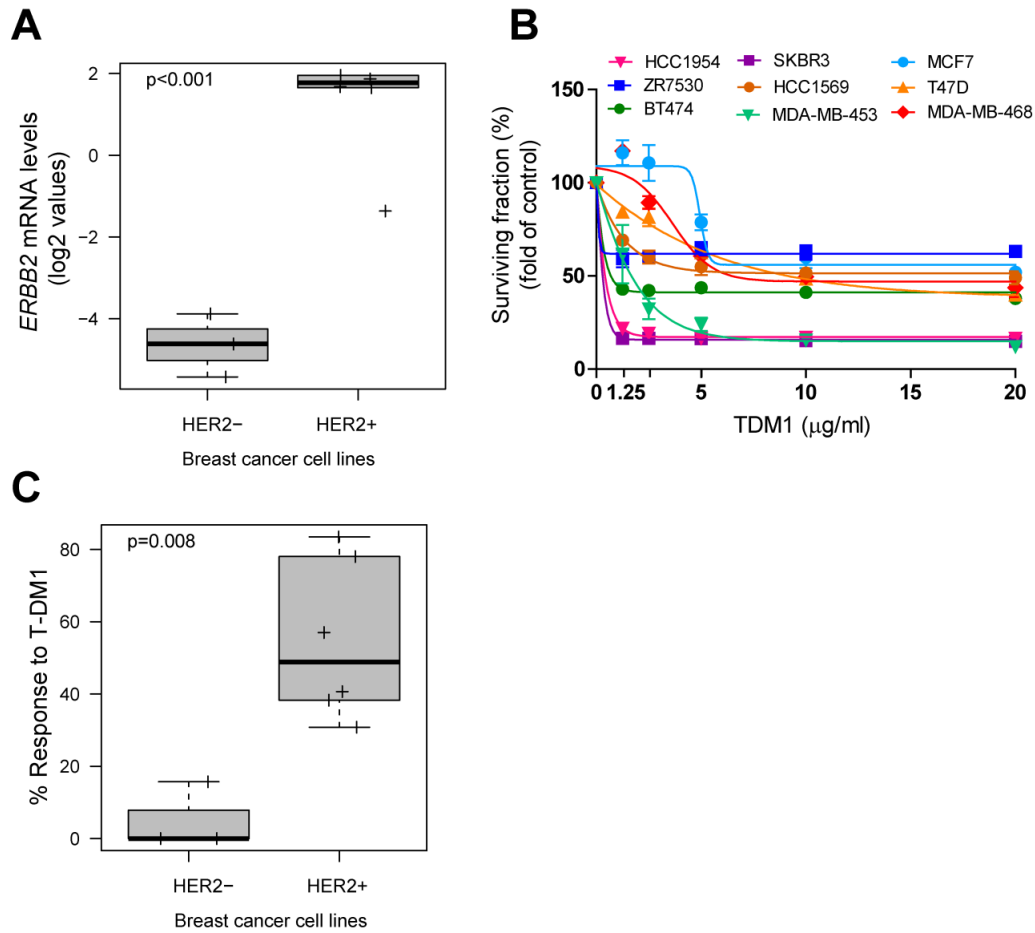

**Figure S2.** *ERBB2* mRNA levels and T-DM1 response in BC cell lines. **(A)** *ERBB2* mRNA in HER2-negative and HER2+ BC cell lines. **(B)** Surviving fraction (%) of 9 BC cell lines upon 72 h of treatment with increasing concentrations of T-DM1. Data points represent the mean; error bars represent the standard error of the mean of 3 independent experiments. **(C)** BC cell lines response to 1.25 mg/mL T-DM1 expressed as 1-cell viability (%). *p*-values were determined using a two-tailed unpaired t-test.

**A**

| HER2 IHC group | <i>ERBB2</i> median (log2 values) |             |
|----------------|-----------------------------------|-------------|
|                | HCB                               | TCGA        |
| 0              | -1.886334137                      | 12.09052929 |
| 1+             | -1.58055385                       | 12.59103276 |
| 2+/FISH-       | -1.283708425                      | 12.86175768 |
| 2+/FISH+       | -0.046650515                      | 13.71543238 |
| 3+             | 2.712896747                       | 16.54240248 |

**B**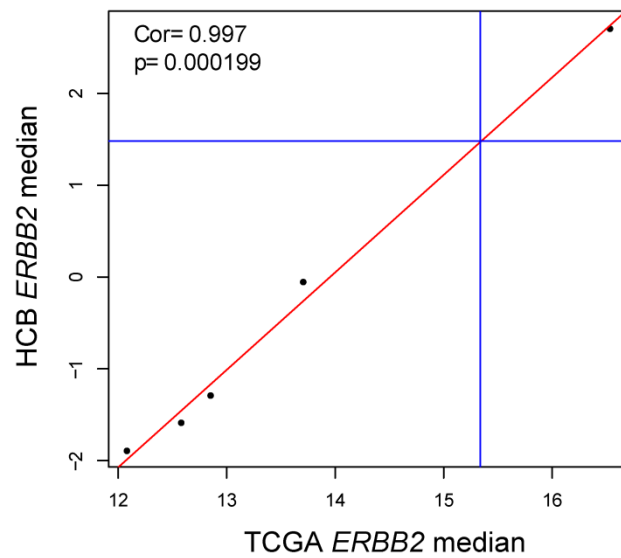

**Figure S3.** Determination of an *ERBB2* mRNA cutoff for the TCGA dataset. **(A)** *ERBB2* median expression levels across HER2 IHC groups of the primary BC HCB and TCGA datasets. **(B)** Pearson's correlation between the median *ERBB2* mRNA log2 expression values in each HER2 IHC subgroup of the HCB and TCGA datasets.

### Screening

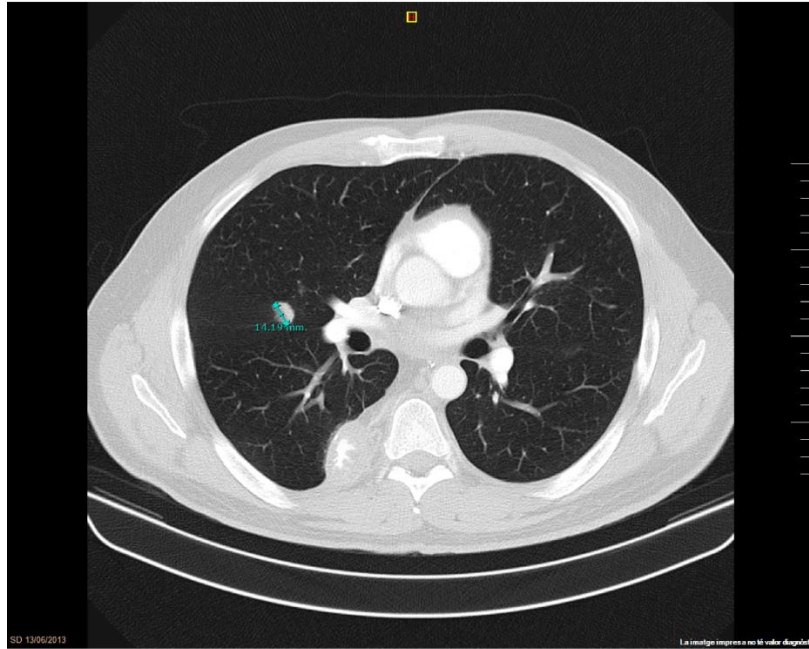

### Pre Cycle 3

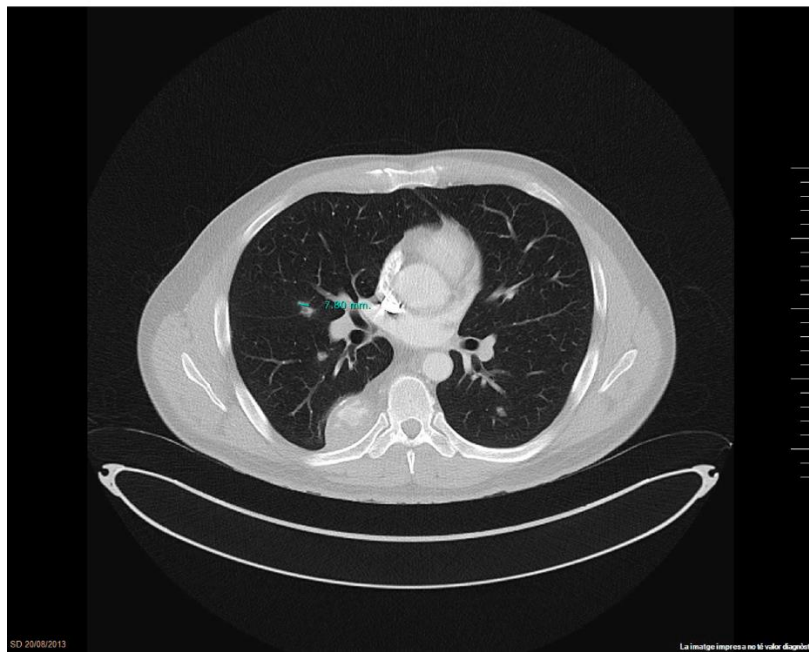

**Figure S4.** Partial response to T-DM1 in gastric cancer patient. CT scan images of right upper lobe lung metastasis at screening and after 2 complete cycles of T-DM1 treatment. Screening image scale bar: 222 mm. Pre Cycle 3 image scale bar: 245 mm.
